# Supplementary material for: Efficient Glycerol Carbonylation over Multimetallic ZIF Catalysts: Synergy of Structure Regulation and Charge Optimization
Source: Research Square preprint supplement (doi:10.21203/rs.3.rs-7987190/v1), 2025-11-12
Supplement: Supplementary file 1 [file 19d9cd57ada1d38c7811110f.docx]

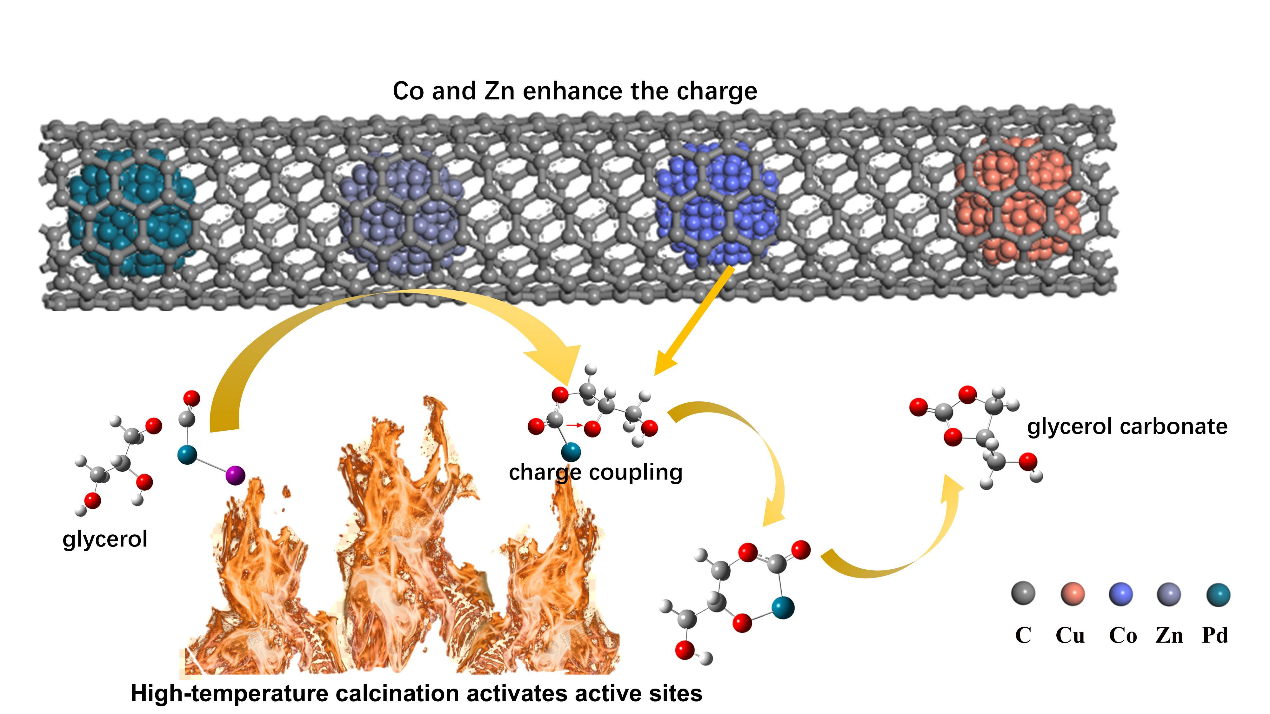


Research and development of multi metal ZIF derived catalysts have revealed the key effects of copper calcination temperature and simulation methods on the activity of glycerol carbonylation reaction under transition state and natural charge effects.
