# Supplementary material for: Efficient Glycerol Carbonylation over Multimetallic ZIF Catalysts: Synergy of Structure Regulation and Charge Optimization
Source: Research Square preprint supplement (doi:10.21203/rs.3.rs-7987190/v1), 2025-11-12
Supplement: Supplementary file 3 [file d1d9881579e1672ac1f8e0c9.docx]

Highlights

1. Synergistic catalysis of ZIF common metals with palladium

2. Transition of metals alone and in combination to study carbonylation reactions

3. Study of transition state and natural charge effects using simulations
